# Supplementary material
Source: Springer Nature journal article supplement (https://www.springermedizin.de/resource/supplementary/12874_2013_1023_MOESM1_ESM.pdf/9433092)

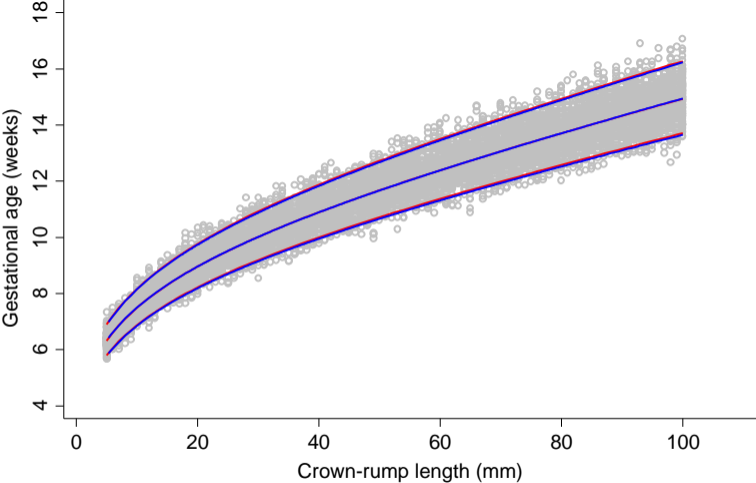

○ Generated data — Simulated model fit — Verburg original fit

Supplement: MOESM1 [file 9433092]
